# Supplementary material for: Functional Analysis of a Wheat AGPase Plastidial Small Subunit with a Truncated Transit Peptide
Source: MDPI journal article supplement (doi:10.3390/molecules22030386), 2017-03-01
Supplement: s1 [file s1]

**Table S1.** Primers used in this study.

| Types        | Primer names     | Primer sequences (5' to 3') |
|--------------|------------------|-----------------------------|
| FJ643609-GFP | GFP-F            | CGGGGTACCATGGCGATGGCCG      |
| vector       | GFP-R            | CGCGGATCCTATGACTGTTCCAC     |
| EU586278-GFP | GFP-F            | CGGGGTACCATGGCGATGGCCG      |
| vector       | GFP-R            | CGCGGATCCTATGACTGTTCCAC     |
| qPCR         | qPCR-F           | AAGATCCTGATCCCTCCG          |
|              | qPCR-R           | CTAGTCCCTGCACCACCT          |
|              | $\beta$ -actin-F | AGCGGTCGAACAACCTGGTA        |
|              | $\beta$ -actin-R | AAACGAAGGATAGCATGAGGAAGC    |
|              | GAPDH-F          | TTTTCACCGACAAGGACA          |
|              | GAPDH-R          | AAGAGGAGCAAGGCAGTT          |

Notes: F, forward primer, R, reverse primer.

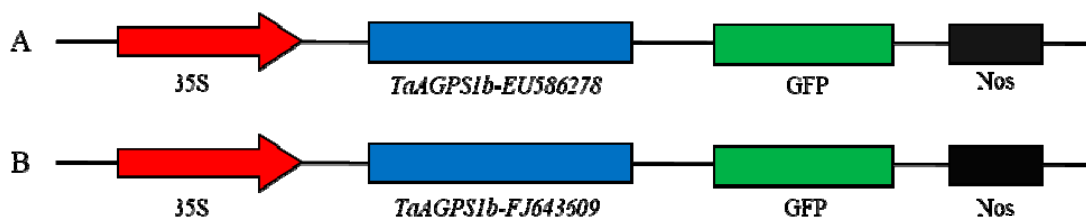

**Figure S1.** The plasmid constructs of *TaAGPS1b-EU586278* (A) and *TaAGPS1b-FJ643609* (B) for subcellular localization. 35S, CaMV 35S promoter; GFP, the green fluorescent protein gene; Nos, Nos terminator.

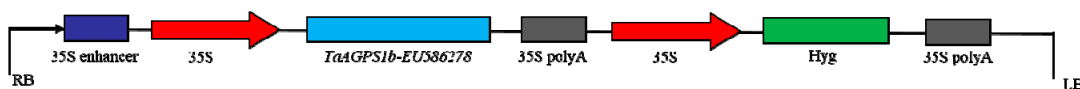

**Figure S2.** Construction of an expression cassette pWM101-EU586278 in a binary vector was performed as described in the Materials and Methods. 35S, CaMV 35S promoter; *TaAGPS1b-EU586278*, CDS sequence of *EU586278* transcript; Hyg, hygromycin resistance gene; RB, right T-DNA border; LB, left T-DNA border.

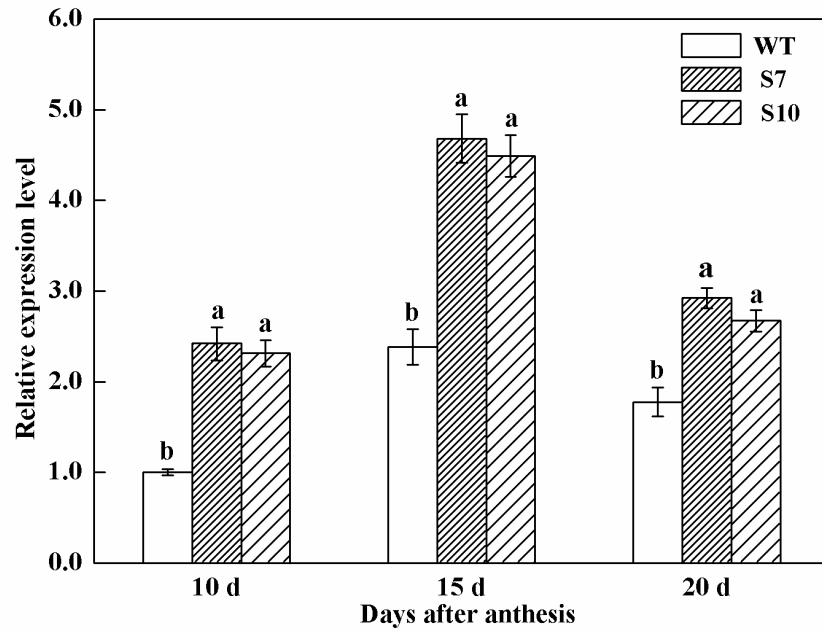

**Figure S3.** Transcript levels of *TaAGPS1b-EU586278* in endosperm of the developing grains of WT and transgenic wheat lines. Notes: (1) Transcript levels at 10, 15 and 20 days after anthesis were measured by qPCR using *GAPDH* gene as internal control. (2) WT, the untransformed wild plant; S7 and S10, two independent *TaAGPS1b-EU586278* T<sub>3</sub> transgenic wheat lines. (3) Each value is the mean  $\pm$  SD of three independent biological replicates. Different letters represented statistical significance at  $P < 0.05$ .
